# Supplementary material for: Respiratory Syncytial Virus Reinfections in Children in Western Australia
Source: MDPI journal article supplement (doi:10.3390/v15122417), 2023-12-13
Supplement: s1 [file s1]

## Article

# Respiratory Syncytial Virus Reinfections in Children in Western Australia

David A. Foley <sup>1,2,3,\*</sup>, Cara A. Minney-Smith <sup>1</sup>, Wei Hao Lee <sup>3,4</sup>, Daniel B. Oakes <sup>2</sup>, Briony Hazelton <sup>1,5</sup>, Timothy J. Ford <sup>3,5</sup>, Ushma Wadia <sup>2,5,6</sup>, Chisha Sikazwe <sup>1,7</sup>, Hannah C. Moore <sup>2,8</sup>, Mark P. Nicol <sup>2,9</sup>, Avram Levy <sup>1,7</sup> and Christopher C. Blyth <sup>1,2,3,5</sup>

<sup>1</sup> Department of Microbiology, PathWest Laboratory Medicine WA, Nedlands, WA 6009, Australia; cara.minney-smith@health.wa.gov.au (C.A.M.-S.); briony.hazelton@health.wa.gov.au (B.H.); chisha.sikazwe@health.wa.gov.au (C.S.); avram.levy@health.wa.gov.au (A.L.); christopher.blyth@uwa.edu.au (C.C.B.)

<sup>2</sup> Wesfarmers Centre of Vaccines and Infectious Diseases, Telethon Kids Institute, University of Western Australia, Perth, WA 6009, Australia; daniel.oakes@telethonkids.org.au (D.B.O.); ushma.wadia@health.wa.gov.au (U.W.); hannah.moore@telethonkids.org.au (H.C.M.); mark.nicol@uwa.edu.au (M.P.N.)

<sup>3</sup> School of Medicine, University of Western Australia, Perth, WA 6009, Australia; weihao.lee@health.wa.gov.au (W.H.L.); tim.ford@health.wa.gov.au (T.J.F.)

<sup>4</sup> Department of General Paediatrics, Perth Children's Hospital, Nedlands, WA 6009, Australia

<sup>5</sup> Department of Infectious Diseases, Perth Children's Hospital, Nedlands, WA 6009, Australia

<sup>6</sup> Department of General Paediatrics, Fiona Stanley Hospital, Murdoch, WA 6150, Australia

<sup>7</sup> Marshall Centre for Infectious Diseases, School of Biomedical Sciences, University of Western Australia, Perth, WA 6009, Australia

<sup>8</sup> School of Population Health, Curtin University, Perth, WA 6009, Australia

<sup>9</sup> Marshall Centre, Biomedical Sciences, University of Western Australia, Perth, WA 6009, Australia

\* Correspondence: david.foley@telethonkids.org.au

**Table S1.** The detection profile and rationale of detections identified as persistent.

| ID | Detections excluded | Interval (days) | Age-Group at first detection | Rationale                                                                                                                                                                                                                            |
|----|---------------------|-----------------|------------------------------|--------------------------------------------------------------------------------------------------------------------------------------------------------------------------------------------------------------------------------------|
| 1  | 1                   | 74              | 1-4 yrs                      | Late detection for second detection (>35) with discrepant results on the second assay.                                                                                                                                               |
| 2  | 1                   | 76              | 1-4 yrs                      | Hyperinsulinemia, congenital central hypoventilation syndrome with tracheostomy; late detection (>35) for second with discrepant detections results on additional testing. 2nd detection occurred when presenting with constipation. |
| 3  | 1                   | 76              | 1-4 yrs                      | Extreme prematurity, inhaled fluticasone; on hydrocortisone replacement therapy; interval positive results, same RSV type with late second detection. Other viral aetiology identified for respiratory presentation (parainfluenza). |
| 4  | 1                   | 96              | <1 yr                        | Multiple complex congenital anomalies with immunodeficiency and respiratory muscular insufficiency. Same RSV type (A) with late detection (35) for this test, with other discrepant results.                                         |
| 5  | 1                   | 105             | <1 yr                        | Syndrome with immunodeficiency and agenesis of the corpus callosum. Late detection for second with the same type (B). Non-respiratory presentation for the second detection.                                                         |
| 6  | 1                   | 126             | 5-15 yrs                     | Cystic fibrosis on oral steroids for allergic bronchopulmonary aspergillosis and specific antibody deficiency. Multiple interval detections.                                                                                         |

|    |   |    |          |                                                                                                                                                                                                                                                                                   |
|----|---|----|----------|-----------------------------------------------------------------------------------------------------------------------------------------------------------------------------------------------------------------------------------------------------------------------------------|
| 7  | 2 | 56 | <1 yr    | Same RSV type (type B), late detection (>35) for second; presentation for second detection with gastrointestinal upset                                                                                                                                                            |
| 8  | 2 | 57 | <1 yr    | Tracheomalacia. Testing for the second detection was undertaken as part of a planned bronchoscopy for tracheomalacia. Late detection for the second detection (>35) and discrepant results on the alternative test.                                                               |
| 9  | 2 | 57 | <1 yr    | Late detection on second detection (>35). Non-respiratory presentation for the second test.                                                                                                                                                                                       |
| 10 | 2 | 57 | 5-15 yrs | Profoundly immunocompromised with lymphoproliferative syndrome with multiple detections in the intervening period. No new respiratory symptoms                                                                                                                                    |
| 11 | 2 | 59 | 1-4 yrs  | Extreme prematurity. Second detection (>35) with discrepant results on the second test. An alternative virus was detected that was attributed to presentation (adenovirus).                                                                                                       |
| 12 | 2 | 60 | 1-4 yrs  | Hepatoblastoma on treatment; multiple interval detections with declining detection strength.                                                                                                                                                                                      |
| 13 | 2 | 62 | 1-4 yrs  | Prematurity. Late detection (>35) for the second detection with the same type detected (A).                                                                                                                                                                                       |
| 14 | 2 | 63 | <1 yr    | Prematurity. Late detection for the second (>35) with an alternative virus detected that was attributed to presentation (adenovirus).                                                                                                                                             |
| 15 | 2 | 63 | 1-4 yrs  | Renal cell sarcoma on treatment with multiple detections over the intervening period.                                                                                                                                                                                             |
| 16 | 2 | 64 | <1 yr    | Extreme prematurity: Second detection at the detection limit with a discrepant second test. Other respiratory virus detected (parainfluenza)                                                                                                                                      |
| 17 | 2 | 64 | <1 yr    | Lympho-vascular malformation of tongue; late second detection (>35). 2nd presentation for additional imaging; no respiratory symptoms                                                                                                                                             |
| 18 | 2 | 66 | <1 yr    | Trisomy 21, severe pulmonary hypertension, poor weight gain. Multiple interval detections with declining strength; same RSV type (B). No new clinical symptoms with detection at 66 days                                                                                          |
| 19 | 2 | 71 | 5-15 yrs | Acute lymphoblastic leukaemia; same RSV type (A) with multiple interval detections.                                                                                                                                                                                               |
| 20 | 2 | 75 | <1 yr    | Multiple interval detections: late detection (>35) on one assay at day 75, with discrepant results on repeat testing the next day. Another new respiratory virus was detected (human metapneumovirus).                                                                            |
| 21 | 2 | 75 | 1-4 yrs  | Viral-induced wheeze with two five-day courses of oral prednisolone in between—interval positives with late second detection of same RSV type (B).                                                                                                                                |
| 22 | 2 | 77 | <1yr     | Investigated for immunodeficiency for recurrent infections, failure to thrive, and recurrent unexplained hypoglycaemia. Multiple interval detections with declining detection strength. A new virus was detected (adenovirus); the second presentation was associated with fever. |
| 23 | 2 | 77 | 1-4 yrs  | Acute lymphocytic leukaemia; same RSV type, declining detection strength, no new symptoms.                                                                                                                                                                                        |
| 24 | 2 | 78 | 1-4 yrs  | On fluticasone, asthma; mannose-binding lectin deficiency. Treated with oral prednisolone at first presentation for five days. Admitted with fever; adenovirus LRTI. Late detection of RSV (>35).                                                                                 |
| 25 | 2 | 86 | <1 yr    | Extreme prematurity, late detection (>35) for second, with other interval detection at 46 days; same RSV type; no respiratory symptoms at day 86.                                                                                                                                 |

|    |   |    |       |                                                                                                          |
|----|---|----|-------|----------------------------------------------------------------------------------------------------------|
|    |   |    |       | alternative aetiology identified for presentation- gastrointestinal upset with cryptosporidium detected. |
| 26 | 2 | 94 | <1 yr | Prematurity. Late detection for second detection (>35) with discrepant results on the second assay.      |

**Table S2.** The inpatient management of the first and second detection. P-values were calculated by comparing the subgroups using  $\chi^2$ ; -,  $p>0.05$ . GI, gastrointestinal.

| First Detection           | All       | Predisposing Factor | No Predisposing Factor | p-value |
|---------------------------|-----------|---------------------|------------------------|---------|
| <b>Management</b>         | 237       | 139                 | 98                     |         |
|                           | % (N)     | % (N)               | % (N)                  |         |
| Nutritional Support (Any) | 62% (147) | 64% (89)            | 59% (58)               | -       |
| • Intravenous fluids      | 31% (73)  | 34% (47)            | 26% (26)               | -       |
| Respiratory support (any) | 74% (178) | 76% (107)           | 72% (71)               | -       |
| • Low flow                | 44% (104) | 41% (58)            | 46% (46)               | -       |
| • Pressure support        | 27% (64)  | 31% (43)            | 21% (21)               | -       |
| • Mechanical ventilation  | 4% (10)   | 4% (6)              | 4% (4)                 | -       |
| Antibiotics               | 46% (111) | 52% (73)            | 38% (38)               | -       |
| Chest x-ray               | 51% (121) | 55% (77)            | 44% (44)               | -       |
| Phlebotomy                | 56% (134) | 61% (86)            | 48% (48)               | 0.048   |
| Intensive Care            | 14% (33)  | 16% (23)            | 10% (10)               | -       |

  

| Second Detection          | All       | Predisposing Factor | No Predisposing Factor | p-value |
|---------------------------|-----------|---------------------|------------------------|---------|
| <b>Management</b>         | 219       | 128                 | 91                     |         |
| Nutritional Support (Any) | 36% (79)  | 45% (57)            | 24% (22)               | 0.002   |
| • Intravenous fluids      | 25% (54)  | 32% (41)            | 14% (13)               | 0.002   |
| Respiratory support (any) | 57% (125) | 67% (86)            | 43% (39)               | 0.0004  |
| • Low flow                | 34% (75)  | 38% (48)            | 30% (27)               | -       |
| • Pressure support        | 22% (48)  | 29% (37)            | 12% (11)               | 0.003   |
| • Mechanical ventilation  | 1% (2)    | 1% (1)              | 1% (1)                 | -       |
| Antibiotics               | 47% (104) | 58% (74)            | 33% (30)               | 0.001   |
| Chest x-ray               | 48% (106) | 54% (69)            | 41% (37)               | -       |
| Phlebotomy                | 51% (111) | 59% (76)            | 38% (35)               | 0.002   |
| Intensive Care            | 9% (20)   | 11% (14)            | 7% (6)                 | -       |
